# Supplementary material for: Design rules for ternary CO2 hydrogenation catalysts via literature-sourced network construction and analysis
Source: Royal Society of Chemistry journal article supplement (doi:10.1039/d6sc00563b), 2026-04-09
Supplement: d6sc00563b1.pdf [file d6sc00563b1.pdf]

## Design Rules for Ternary CO<sub>2</sub> Hydrogenation Catalysts via Literature-Sourced Network Construction and Analysis

Yoshiki Hasukawa,<sup>a</sup> Fernando Garcia-Escobar,<sup>a</sup> Shu Nishimura,<sup>b</sup> Keisuke Takahashi<sup>\*,a,c</sup>, and Lauren Takahashi,<sup>\*a</sup>

<sup>a</sup>Department of Chemistry, Hokkaido University, North 10, West 8, Sapporo 060-0810, Japan

<sup>b</sup>Graduate School of Advanced Science and Technology, Japan Advanced Institute of Science and Technology, 1-1 Asahidai, Nomi, Ishikawa 923-1292, Japan

<sup>c</sup>List Sustainable Digital Transformation Catalyst Collaboration Research Platform, Institute for Chemical Reaction Design and Discovery, Hokkaido University, Sapporo 001-0020, Japan

E-mail: [keisuke.takahashi@sci.hokudai.ac.jp](mailto:keisuke.takahashi@sci.hokudai.ac.jp); [lauren.takahashi@sci.hokudai.ac.jp](mailto:lauren.takahashi@sci.hokudai.ac.jp)

K-means clusters

|                              |                                                                                                                                             |
|------------------------------|---------------------------------------------------------------------------------------------------------------------------------------------|
| Base wt%                     | 0.0-7.0%, <b>7.5-15.0%</b> , 17.0-26.0%, 27.5-40.0%, 47.0-100.0%                                                                            |
| Base 2 wt%                   | <b>0.0-3.0%</b> , 4.0-10.0%, 12.5-17.0%, 25.0-37.5%                                                                                         |
| Support wt%                  | 0.0-60.7%, 62.5-80.0%, <b>81.0-91.5%</b> , 92.0-100.0%                                                                                      |
| CO <sub>2</sub> Conversion % | 0.0-5.61%, 5.63-14.15%, 14.19-24.52%, <b>24.62-35.37%</b> , 35.4-46.03%, 46.08-56.88%, 57.0-67.53%, 67.59-77.5%, 77.52-88.38%, 88.41-100.0% |

Knowledge network built from the literature

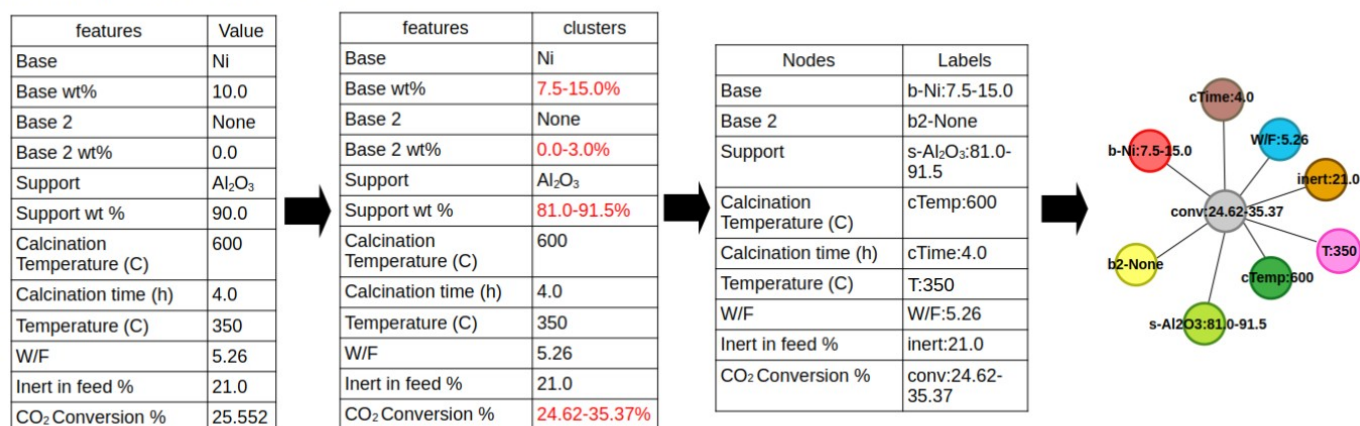

FigureS1 Conversion from literature data to network for N-1. This is an example of network construction for one data (Base: Ni, Base wt%: 10.0, Base 2: None, Base 2 wt%: 0.0, Support: Al<sub>2</sub>O<sub>3</sub>, Support: wt%: 90.0, Calcination Temperature (C): 600, Calcination time (h): 4.0, Temperature (C): 350, W/F: 5.26, Inert in feed %: 21.0, CO<sub>2</sub> Conversion %: 25.552). The data points transformed by the corresponding clusters for each variable are shown in red.

K-means clusters

|                              |                                                                                                                                     |
|------------------------------|-------------------------------------------------------------------------------------------------------------------------------------|
| Base wt%                     | 0.0-7.0%, <b>7.5-15.0%</b> , 17.0-26.0%, 27.5-40.0%, 47.0-100.0%                                                                    |
| Base 2 wt%                   | <b>0.0-3.0%</b> , 4.0-10.0%, 12.5-17.0%, 25.0-37.5%                                                                                 |
| Support wt%                  | 0.0-60.7%, 62.5-80.0%, <b>81.0-91.5%</b> , 92.0-100.0%                                                                              |
| CO <sub>2</sub> Conversion % | 0.0-5.61%, 5.63-14.15%, 14.19-24.52%, 24.62-35.37%, 35.4-46.03%, 46.08-56.88%, 57.0-67.53%, 67.59-77.5%, 77.52-88.38%, 88.41-100.0% |

Knowledge network built from the literature

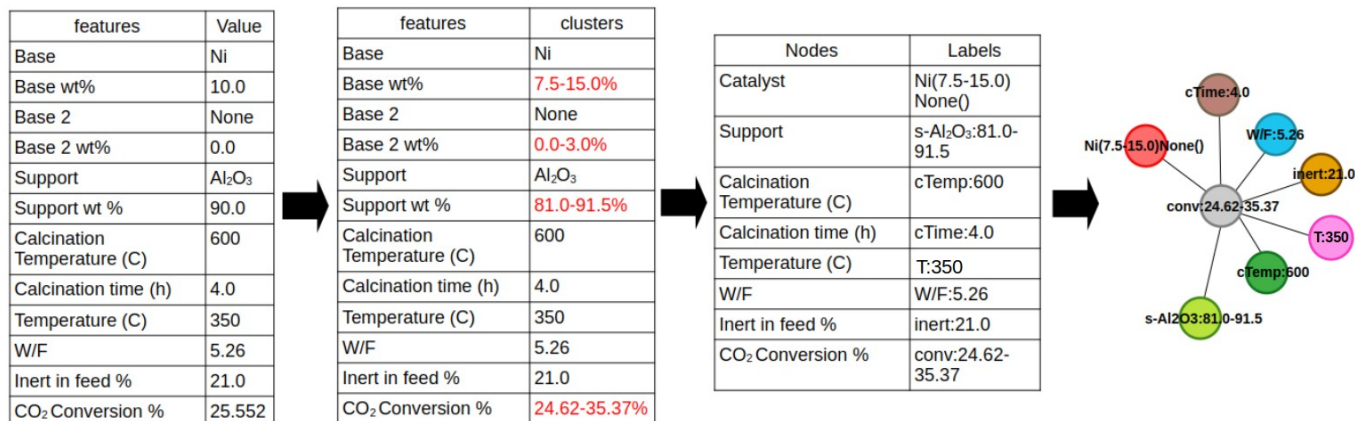

FigureS2 Conversion from literature data to network for N-2. This is an example of network construction for one data(Base: Ni, Base wt%: 10.0, Base 2: None, Base 2 wt%: 0.0, Support: Al<sub>2</sub>O<sub>3</sub>, Support: wt%: 90.0, Calcination Temperature (C): 600, Calcination time (h): 4.0, Temperature(C): 350, W/F: 5.26, Inert in feed %: 21.0, CO<sub>2</sub> Conversion %: 25.552). The data points transformed by the corresponding clusters for each variable are shown in red.

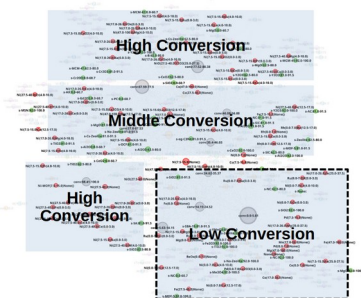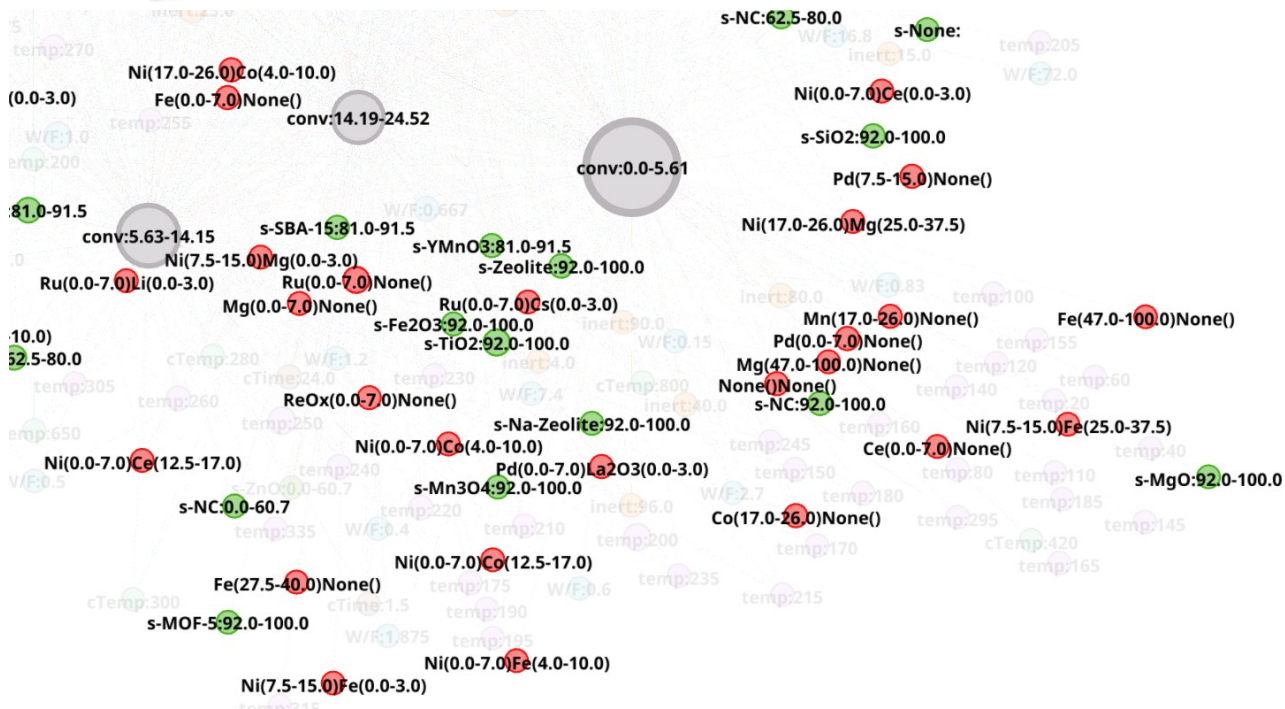

FigureS3 Details of low CO<sub>2</sub> conversion area in the N-2 network. Catalyst(pink), Support(green), and CO<sub>2</sub> conversion(gray) are highlighted. Note that labels are adjusted, and node size is determined by degree ranking within a range of 10 to 40 for visualization purposes.

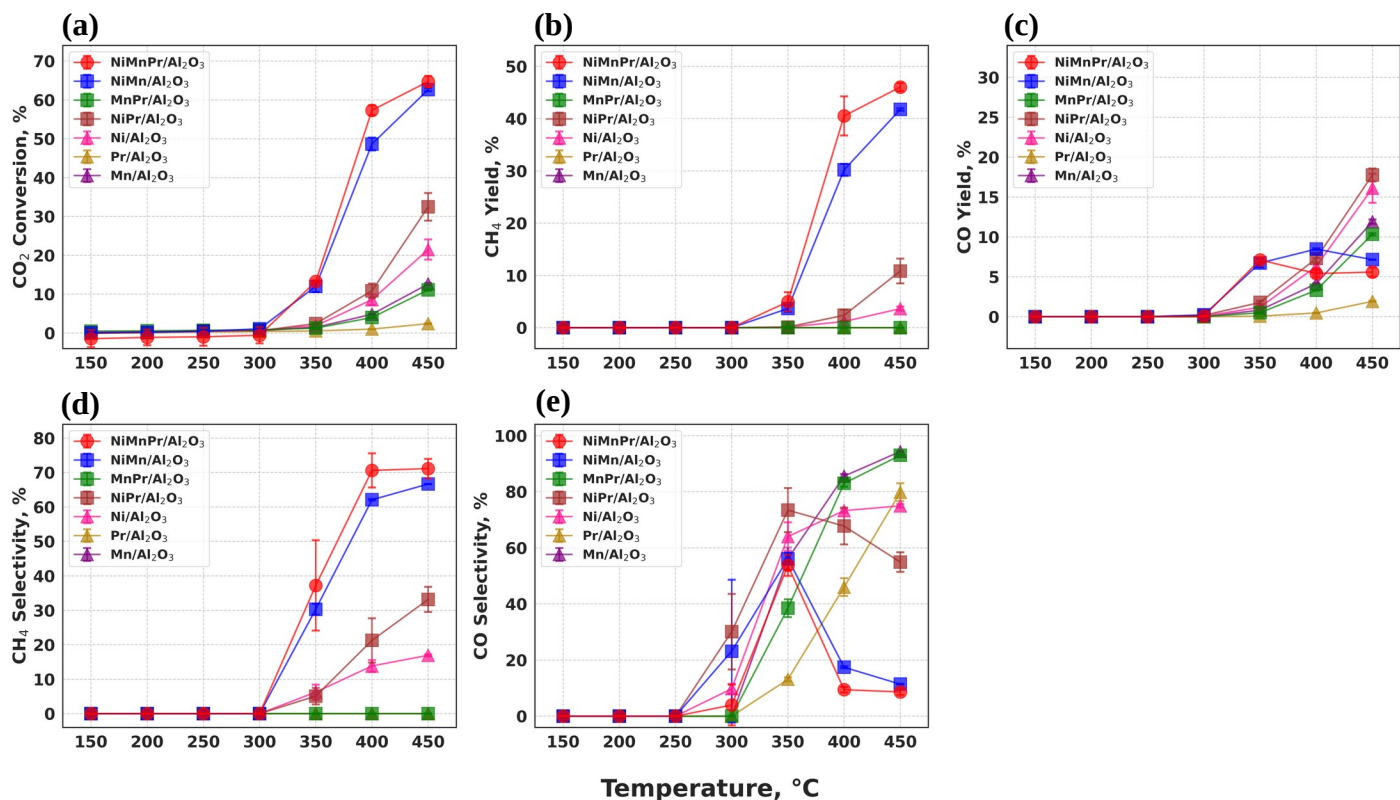

Figure S4 (a) CO<sub>2</sub> conversion, %, (b) CH<sub>4</sub> yield, %, (c) CO yield, %, (d) CH<sub>4</sub> selectivity, %, and (e) CO selectivity, % as a function of temperature for catalysts including Pr. Ternary, binary, and unary catalysts are represented by circles, squares, and triangles, respectively. Note that the plots and error bars at each temperature represent the average and standard deviation of two measurements to ensure reproducibility.

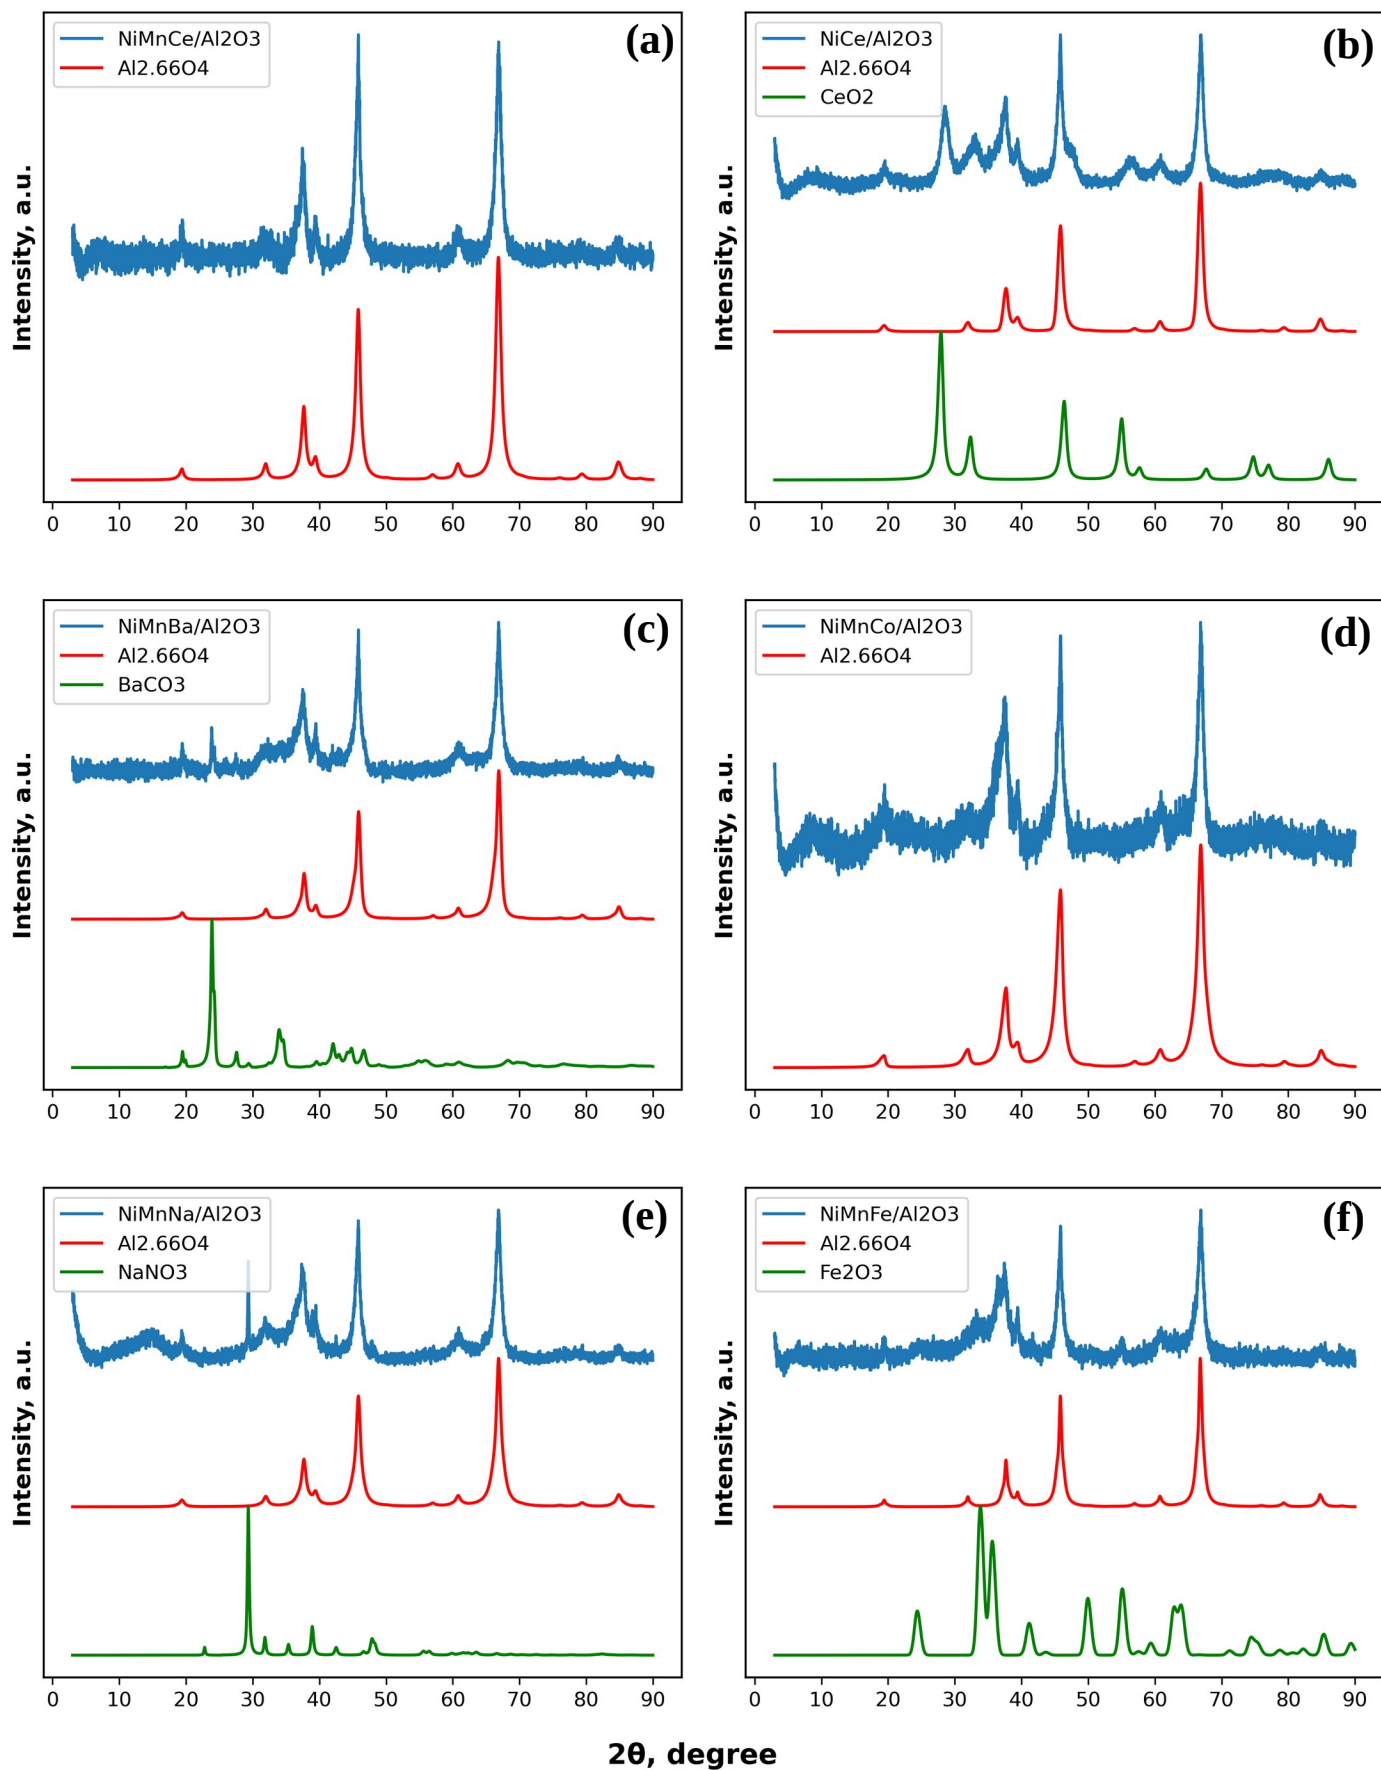

Figure S5 XRD for (a) NiMnCe/Al<sub>2</sub>O<sub>3</sub>, (b) NiCe/Al<sub>2</sub>O<sub>3</sub>, (c) NiMnBa/Al<sub>2</sub>O<sub>3</sub>, (d) NiMnCo/Al<sub>2</sub>O<sub>3</sub>, (e) NiMnNa/Al<sub>2</sub>O<sub>3</sub>, (f) NiMnFe/Al<sub>2</sub>O<sub>3</sub>. The reference patterns shown in red and green are obtained from the built-in database of the Rigaku Miniflex 600-C software.

S5

S5

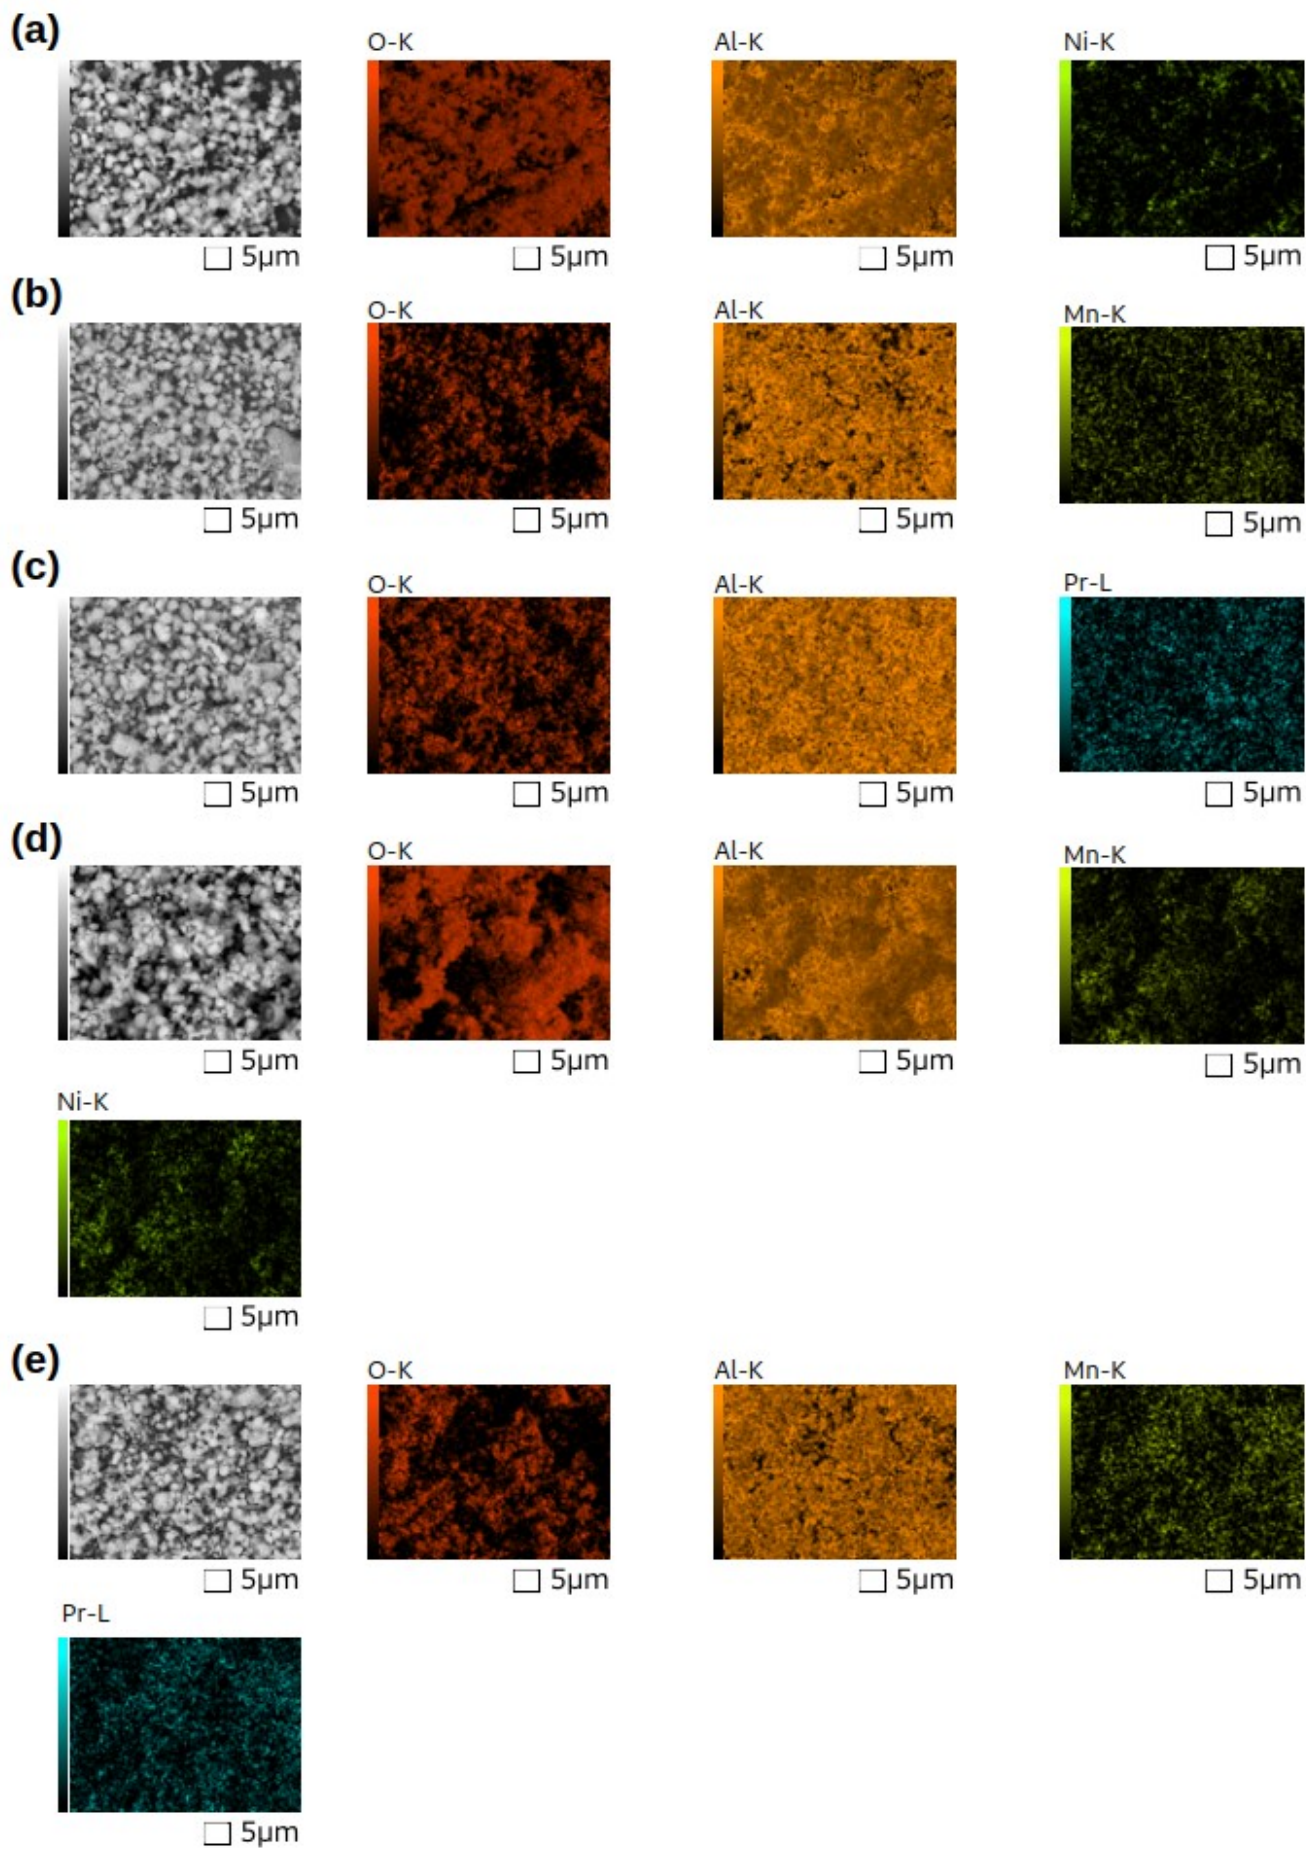

Figure S6 SEM-EDS for (a)  $\text{Ni}/\text{Al}_2\text{O}_3$ , (b)  $\text{Mn}/\text{Al}_2\text{O}_3$ , (c)  $\text{Pr}/\text{Al}_2\text{O}_3$ , (d)  $\text{NiMn}/\text{Al}_2\text{O}_3$ , and (e)  $\text{MnPr}/\text{Al}_2\text{O}_3$

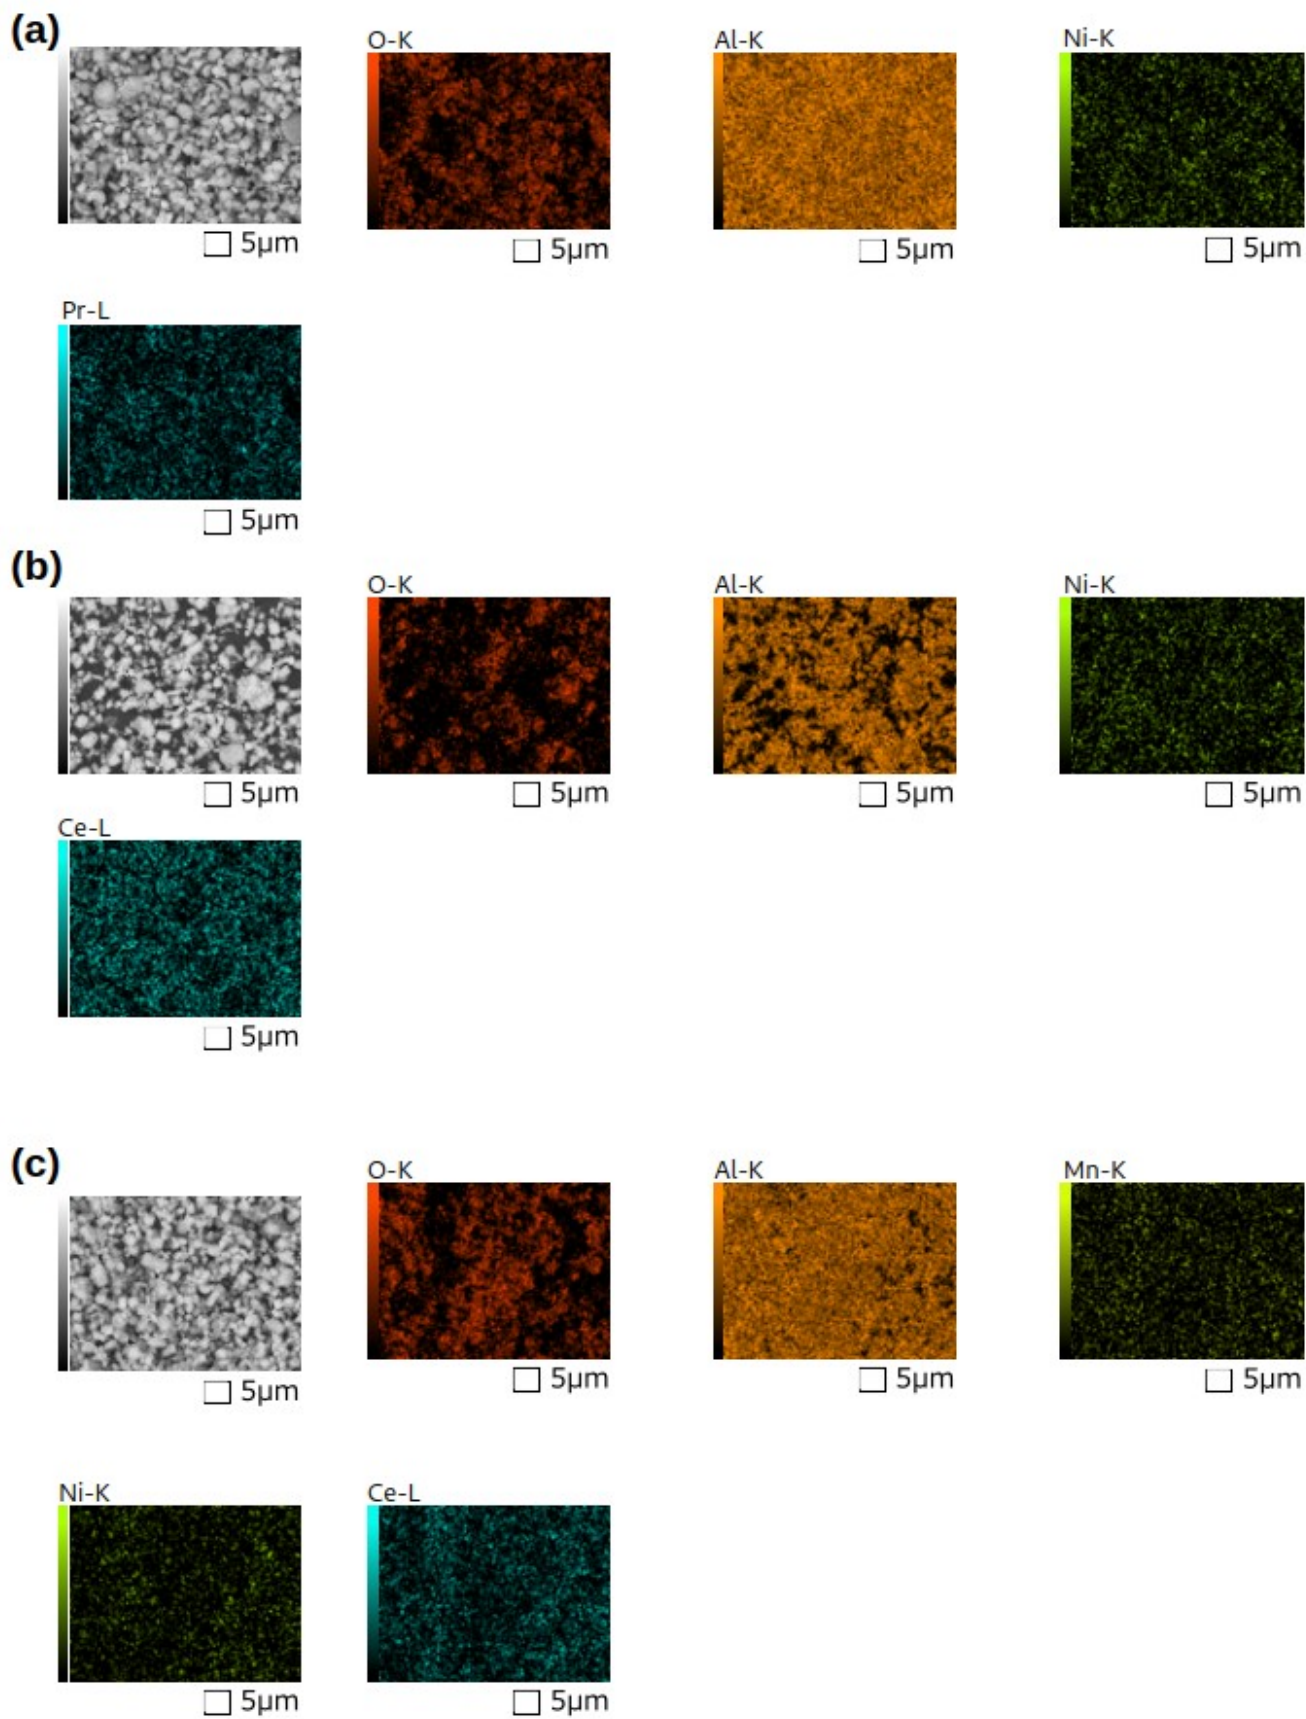

FigureS7 SEM-EDS for (a)NiPr/Al<sub>2</sub>O<sub>3</sub>, (b)NiCe/Al<sub>2</sub>O<sub>3</sub>, and (c)NiMnCe/Al<sub>2</sub>O<sub>3</sub>.

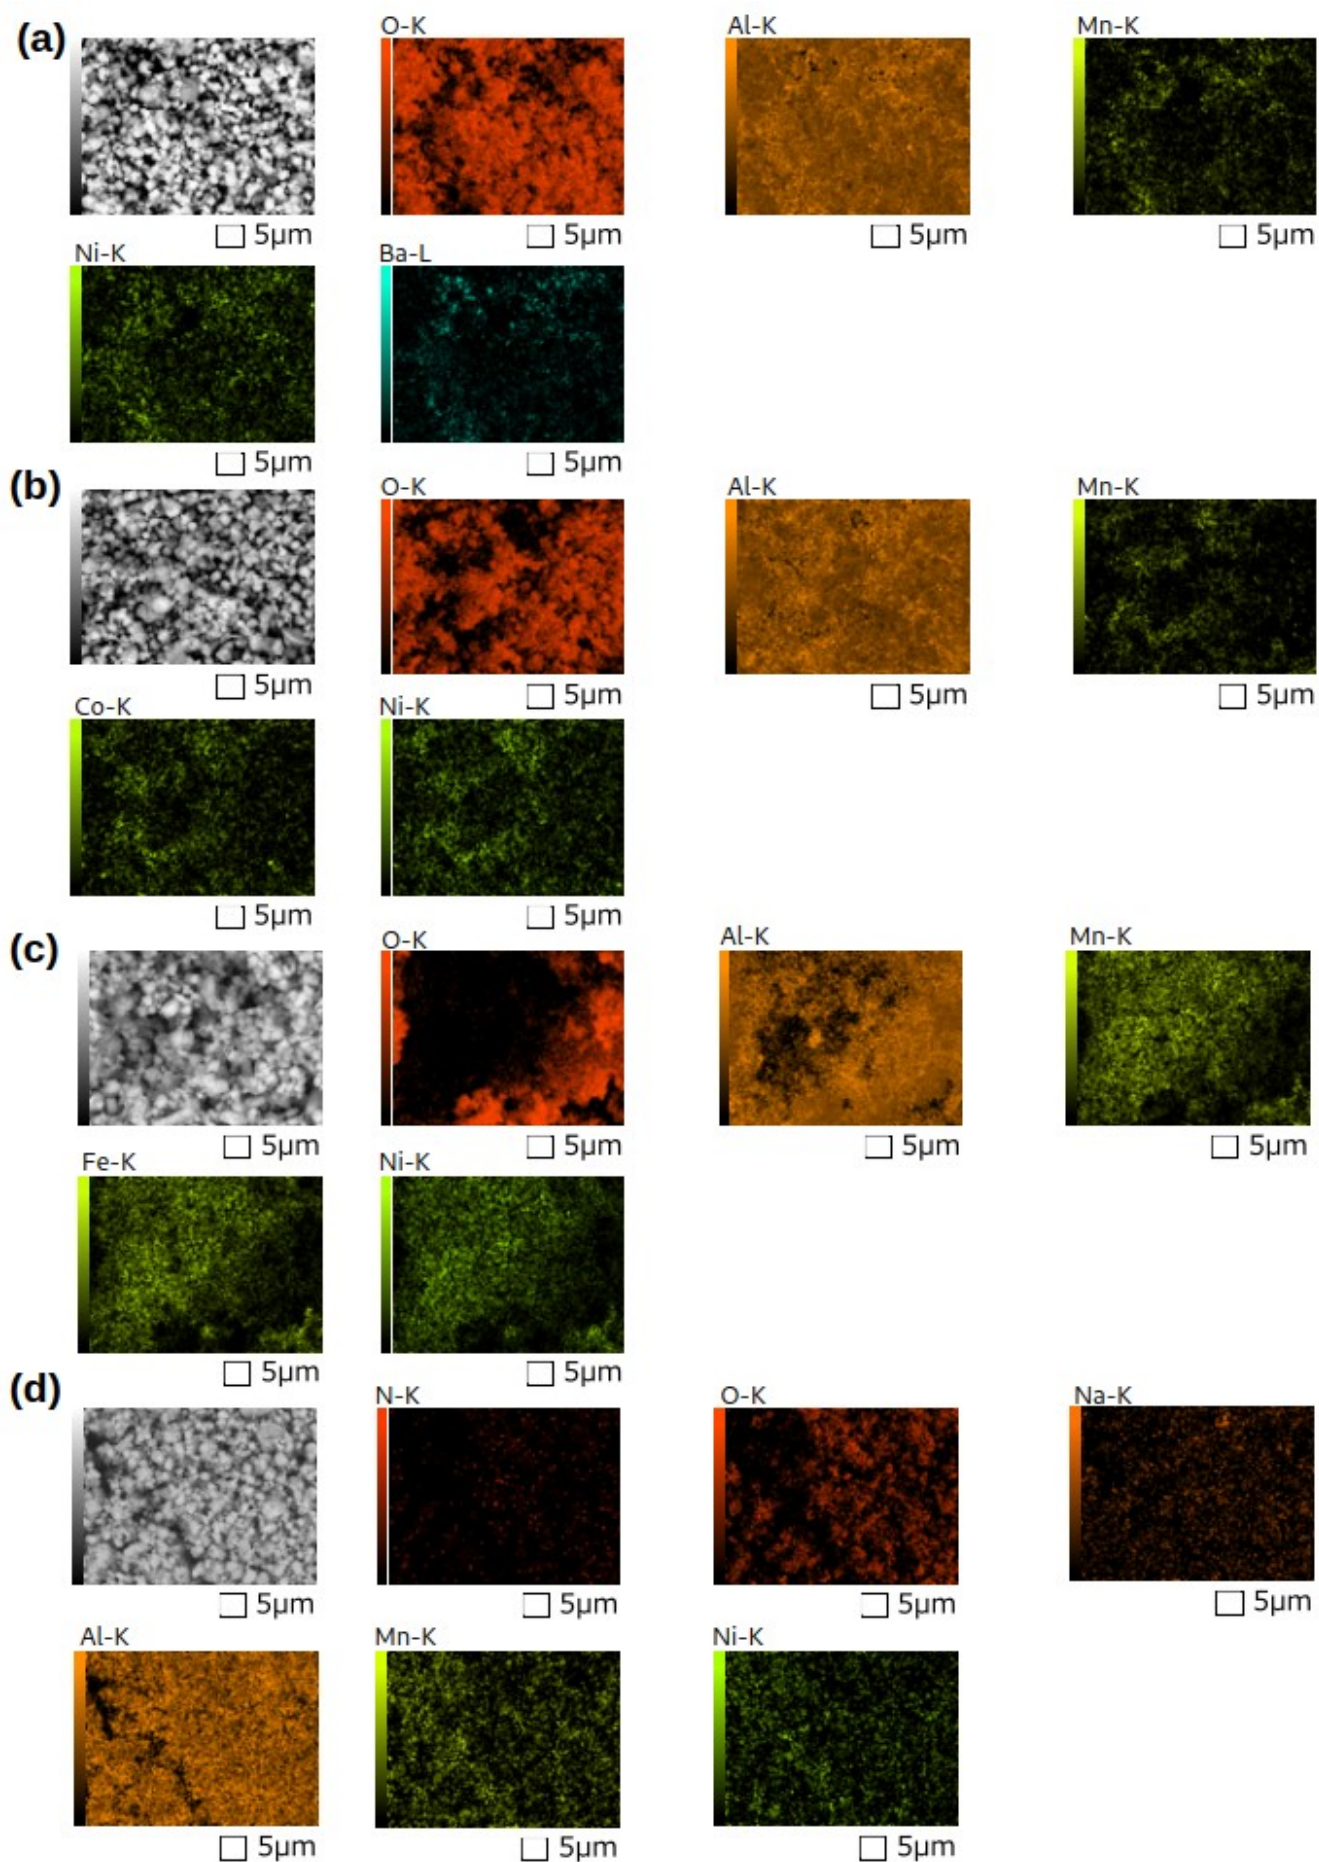

Figure S8 SEM-EDS for (a)  $\text{NiMnBa}/\text{Al}_2\text{O}_3$ , (b)  $\text{NiMnCo}/\text{Al}_2\text{O}_3$ , (c)  $\text{NiMnFe}/\text{Al}_2\text{O}_3$ , and (d)  $\text{NiMnNa}/\text{Al}_2\text{O}_3$ .

Table S1 Comparison of CO<sub>2</sub> conversion activities reported in the literature at 450 °C with a Ni loading of 5 wt%.

| M1 | M2   | M3   | M2 wt% | Support                        | Preparation Method | Red Temp, °C | Red Time, h | Inert Gas, % | H <sub>2</sub> /CO <sub>2</sub> ratio | CO <sub>2</sub> Conv, % | Ref       |
|----|------|------|--------|--------------------------------|--------------------|--------------|-------------|--------------|---------------------------------------|-------------------------|-----------|
| Ni | Mn   | Pr   | 5      | Al <sub>2</sub> O <sub>3</sub> | CI                 | None         | None        | 50           | 4                                     | 64.73                   | This Work |
| Ni | Mn   | Ce   | 5      | Al <sub>2</sub> O <sub>3</sub> | CI                 | None         | None        | 50           | 4                                     | 65.85                   | This Work |
| Ni | Mn   | Co   | 5      | Al <sub>2</sub> O <sub>3</sub> | CI                 | None         | None        | 50           | 4                                     | 51.62                   | This Work |
| Ni | Mn   | Fe   | 5      | Al <sub>2</sub> O <sub>3</sub> | CI                 | None         | None        | 50           | 4                                     | 42.78                   | This Work |
| Ni | Mn   | Na   | 5      | Al <sub>2</sub> O <sub>3</sub> | CI                 | None         | None        | 50           | 4                                     | 48.50                   | This Work |
| Ni | Mn   | Ba   | 5      | Al <sub>2</sub> O <sub>3</sub> | CI                 | None         | None        | 50           | 4                                     | 61.93                   | This Work |
| Ni | None | None | 5      | Al <sub>2</sub> O <sub>3</sub> | MC                 | 500          | 2           | 0            | 4                                     | 6.87                    | S1        |
| Ni | None | None | 10     | Al <sub>2</sub> O <sub>3</sub> | MC                 | 500          | 2           | 0            | 4                                     | 59.34                   | S1        |
| Ni | None | None | 10     | Al <sub>2</sub> O <sub>3</sub> | MC                 | 500          | 2           | 0            | 4                                     | 22.33                   | S1        |
| Ni | None | None | 0      | Al <sub>2</sub> O <sub>3</sub> | MC                 | 500          | 2           | 0            | 4                                     | 53.31                   | S1        |
| Ni | None | None | 0      | Al <sub>2</sub> O <sub>3</sub> | WI                 | 600          | 1           | 21           | 4                                     | 46.97                   | S2        |
| Ni | Ce   | None | 15     | Zeolite                        | IWI                | 470          | 1           | 18.2         | 4                                     | 60.50                   | S3        |
| Ni | None | None | 0      | Al <sub>2</sub> O <sub>3</sub> | EISA               | 500          | 3           | 15           | 5                                     | 69.16                   | S4        |
| Ni | None | None | 0      | Na-Zeolite                     | WI                 | 470          | 1           | 18.2         | 4                                     | 36.3                    | S5        |
| Ni | Ce   | None | 3      | Na-Zeolite                     | WI                 | 470          | 1           | 18.2         | 4                                     | 55.67                   | S5        |
| Ni | Ce   | None | 3      | Na-Zeolite                     | CI                 | 470          | 1           | 18.2         | 4                                     | 52.67                   | S5        |
| Ni | None | None | 5      | Al <sub>2</sub> O <sub>3</sub> | IWI                | 700          | 2           | 45.45        | 5                                     | 38.72                   | S6        |
| Ni | None | None | 0      | Zeolite                        | IWI                | 500          | 2           | 16.7         | 4                                     | 57                      | S7        |
| Ni | None | None | 0      | CeO <sub>2</sub>               | WI                 | 550          | 1           | 25           | 4                                     | 74.26                   | S8        |
| Ni | None | None | 0      | Y <sub>2</sub> O <sub>5</sub>  | WI                 | 550          | 1           | 25           | 4                                     | 73.35                   | S8        |

Note: Red Temp: Reduction Temperature, Red Time: Reduction Time, WI: Wet Impregnation, MC: Mechano Chemical, IWI: Incipient to wetness impregnation, CI: Co-impregnation

#### Reference

- [S1] Shafiee, Parisa, Seyed Mehdi Alavi, and Mehran Rezaei. "Investigation of the effect of cobalt on the Ni-Al<sub>2</sub>O<sub>3</sub> catalyst prepared by the mechanochemical method for CO<sub>2</sub> methanation: P. Shafiee et al." *Research on Chemical Intermediates* 48.5 (2022): 1923-1938.
- [S2] Zhang, Zhanming, et al. "Impacts of nickel loading on properties, catalytic behaviors of Ni/γ-Al<sub>2</sub>O<sub>3</sub> catalysts and the reaction intermediates formed in methanation of CO<sub>2</sub>." *International Journal of Hydrogen Energy* 44.18 (2019): 9291-9306.
- [S3] Graça, I., et al. "CO<sub>2</sub> hydrogenation into CH<sub>4</sub> on NiHNaUSY zeolites." *Applied Catalysis B: Environmental* 147 (2014): 101-110.
- [S4] Aljishi, Ali, et al. "The effect of synthesis parameters on ordered mesoporous nickel alumina catalyst for CO<sub>2</sub> methanation." *Applied Catalysis A: General* 549 (2018): 263-272.

[S5]Bacariza, M. Carmen, et al. "Ni-Ce/Zeolites for CO<sub>2</sub> Hydrogenation to CH<sub>4</sub>: Effect of the Metal Incorporation Order." *ChemCatChem* 10.13 (2018): 2773-2781.

[S6]Chein, Rei-Yu, and Chih-Chang Wang. "Experimental study on CO<sub>2</sub> methanation over Ni/Al<sub>2</sub>O<sub>3</sub>, and RuNi/Al<sub>2</sub>O<sub>3</sub> catalysts." *Catalysts* 10.10 (2020): 1112.

[S7]Goodarzi, Farnoosh, et al. "Methanation of Carbon Dioxide over Zeolite-Encapsulated Nickel Nanoparticles." *ChemCatChem* 10.7 (2018): 1566-1570.

[S8]Sun, Chao, et al. "Ni/CeO<sub>2</sub> nanoparticles promoted by yttrium doping as catalysts for CO<sub>2</sub> methanation." *ACS Applied Nano Materials* 3.12 (2020): 12355-12368.
